# Supplementary material for: DFT and TD-DFT Investigation of a Charge Transfer Surface Resonance Raman Model of N3 Dye Bound to a Small TiO2 Nanoparticle
Source: MDPI journal article supplement (doi:10.3390/nano11061491), 2021-06-04
Supplement: s1 [file s1]

## Supplemental Materials

### DFT and TD-DFT Investigation of a Charge Transfer Surface Resonance Raman Model of N3 Dye Bound to a Small TiO<sub>2</sub> Nanoparticle

Ronald L. Birke \* and John R. Lombardi

Department of Chemistry and Biochemistry, The City College of the City University of New York,  
160 Convent Avenue, New York, New York 10031, USA

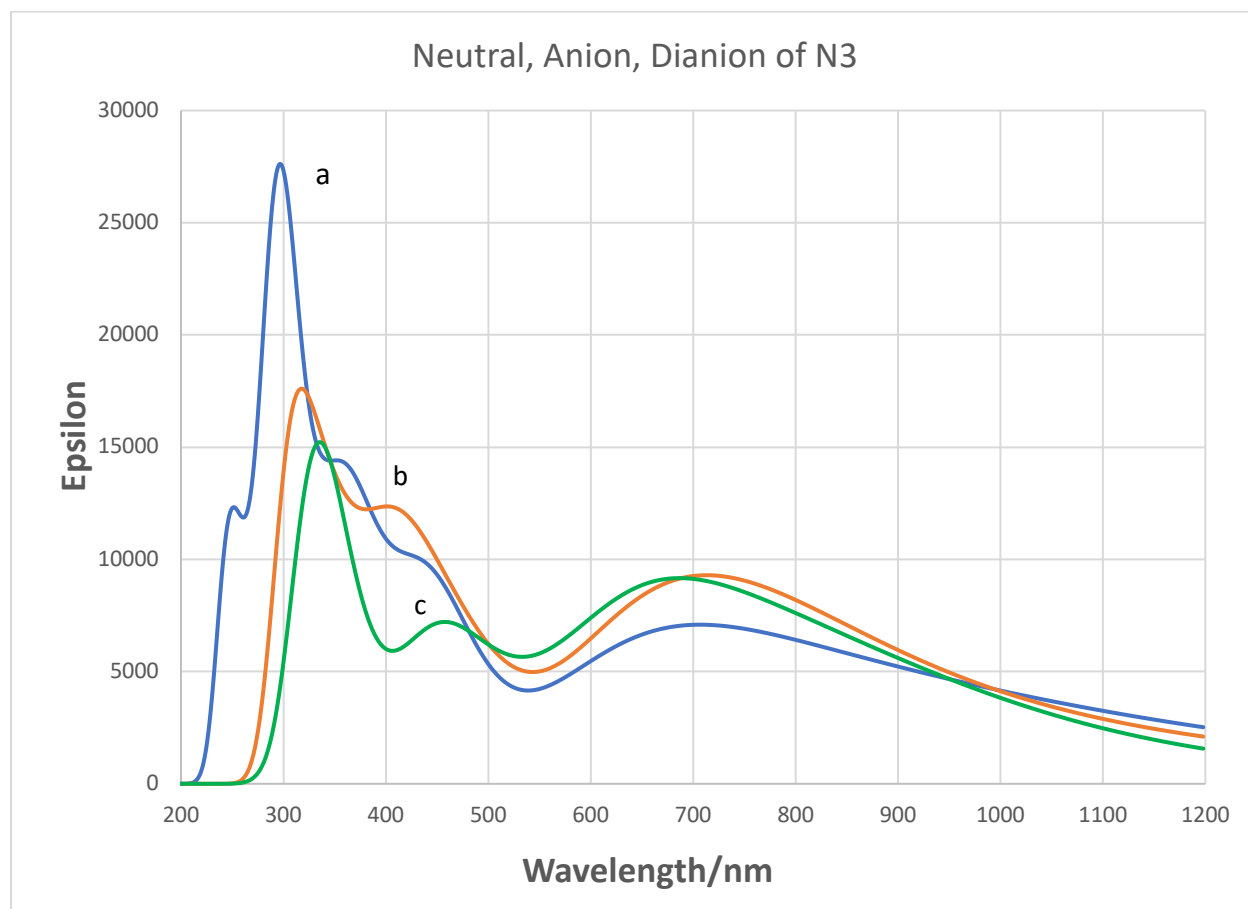

Figure S1. UV-VIS absorption spectra of various forms of N3 in vacuum with B3LYP/6-31+G(d)/LANL2DZ. FWHM broadening is 0.250 eV. a) neutral N3 blue. b) N3 anion red. c) N3 dianion (N719) green.

Table S1. Composition of Selected Excited States

Excited State 1: Singlet-A 0.9808 eV 1264.12 nm  $f=0.0175$   $\langle S^2 \rangle=0.000$

H-3 -> L 0.11634

H-2 -> L 0.18525

H-1 -> L 0.10966

H -> L 0.64463

This state for optimization and/or second-order correction.

Excited State 2: Singlet-A 1.1057 eV 1121.36 nm  $f=0.0019$   $\langle S^2 \rangle=0.000$

H-2 -> L -0.13440

H-1 -> L 0.67530

Excited State 3: Singlet-A 1.2227 eV 1014.00 nm  $f=0.0235$   $\langle S^2 \rangle=0.000$

H-2 -> L -0.42492

H-1 -> L+1 0.13771

H -> L 0.18890

H -> L+1 0.49019

Excited State 4: Singlet-A 1.2770 eV 970.93 nm  $f=0.0151$   $\langle S^2 \rangle=0.000$

H-3 -> L -0.17353

H-2 -> L 0.48513

H-1 -> L+1 0.18006

H -> L+1 0.41049

H -> L+2 0.10147

Excited State 8: Singlet-A 1.6379 eV 756.96 nm  $f=0.0624$   $\langle S^2 \rangle=0.000$

H-3 -> L+1 0.18568

H-3 -> L+2 0.12650

H-2 -> L -0.11528

H-1 -> L+1 0.12352

H-1 -> L+2 0.19022

H -> L 0.13415

H -> L+2 0.57936

Excited State 12: Singlet-A 1.8539 eV 668.76 nm  $f=0.0044$   $\langle S^2 \rangle=0.000$

H-3 -> L+2 0.23493

H-2 -> L+2 -0.10374

H -> L+3 0.48756

H -> L+4 0.42484

Excited State 14: Singlet-A 2.0049 eV 618.41 nm  $f=0.0314$   $\langle S^2 \rangle=0.000$

H -> L+3 0.19488

H -> L+4 -0.15145

H -> L+5 0.62995

Excited State 16: Singlet-A 2.0711 eV 598.65 nm  $f=0.0020$   $\langle S^2 \rangle=0.000$

H-2 -> L +3 0.50370  
H-2 -> L +4 0.46029  
H-2 -> L +5 -0.12585

Excited State 17: Singlet-A 2.1275 eV 582.78 nm f=0.0009 <S\*\*2>=0.000

H-> L+3 -0.41440  
H -> L+4 0.51581  
H -> L+5 0.24341

Excited State 18: Singlet-A 2.1460 eV 577.76 nm f=0.0046 <S\*\*2>=0.000

H-1 -> L+4 -0.24619  
H-1 -> L+5 0.64358

Excited State 21: Singlet-A 2.2597 eV 548.68 nm f=0.0003 <S\*\*2>=0.000

H-1 -> L+3 -0.41157  
H-1 -> L+4 0.50520  
H-1 -> L+5 0.25717

Table S2. Indices of Charge Transfer Distance,  $D_{CT}$  and Charge Passed,  $q_{CT}$ , and Oscillator Strengths.

| State | Energy(eV) | $D_{CT}$ (Å) | QP(a.u.) |
|-------|------------|--------------|----------|
| 1     | 0.981      | 3.828        | 0.876    |
| 2     | 1.106      | 5.394        | 0.914    |
| 3     | 1.223      | 4.361        | 0.855    |
| 4     | 1.277      | 4.274        | 0.87     |
| 5     | 1.345      | 4.499        | 0.948    |
| 6     | 1.431      | 4.573        | 0.893    |
| 7     | 1.507      | 5.833        | 0.883    |
| 8     | 1.638      | 4.897        | 0.905    |
| 9     | 1.692      | 5.574        | 0.927    |
| 10    | 1.72       | 6.069        | 0.934    |
| 11    | 1.774      | 4.825        | 0.926    |
| 12    | 1.854      | 4.409        | 0.921    |
| 13    | 1.914      | 5.421        | 0.952    |
| 14    | 2.005      | 4.923        | 0.91     |
| 15    | 2.035      | 4.953        | 0.96     |
| 16    | 2.071      | 4.373        | 0.956    |
| 17    | 2.127      | 10.426       | 0.985    |
| 18    | 2.146      | 4.804        | 0.957    |
| 19    | 2.219      | 4.732        | 0.985    |
| 20    | 2.253      | 6.526        | 0.952    |

|    |       |        |       |
|----|-------|--------|-------|
| 21 | 2.26  | 10.099 | 0.982 |
| 22 | 2.35  | 4.647  | 0.932 |
| 23 | 2.368 | 5.793  | 0.957 |
| 24 | 2.389 | 8.21   | 0.914 |
| 25 | 2.391 | 4.617  | 0.882 |
| 26 | 2.445 | 3.485  | 0.843 |
| 27 | 2.462 | 11.425 | 0.991 |
| 28 | 2.513 | 5.107  | 0.955 |
| 29 | 2.621 | 5.872  | 0.967 |
| 30 | 2.621 | 9.478  | 0.977 |
| 31 | 2.682 | 4.027  | 0.834 |
| 32 | 2.709 | 2.688  | 0.788 |
| 33 | 2.73  | 5.327  | 0.98  |
| 34 | 2.747 | 4.587  | 0.88  |
| 35 | 2.753 | 8.844  | 0.973 |
| 36 | 2.815 | 9.584  | 0.996 |
| 37 | 2.9   | 11.838 | 0.997 |
| 38 | 2.945 | 9.081  | 0.998 |
| 39 | 2.967 | 11.182 | 0.992 |
| 40 | 2.989 | 2.935  | 0.793 |
| 41 | 3.061 | 4.495  | 0.918 |
| 42 | 3.093 | 11.979 | 0.999 |
| 43 | 3.126 | 11.139 | 0.996 |
| 44 | 3.134 | 9.517  | 0.996 |
| 45 | 3.158 | 11.251 | 0.998 |
| 46 | 3.201 | 3.932  | 0.845 |
| 47 | 3.238 | 1.745  | 0.93  |
| 48 | 3.265 | 9.042  | 0.997 |
| 49 | 3.267 | 8.808  | 0.938 |
| 50 | 3.273 | 10.393 | 0.991 |
| 51 | 3.29  | 3.148  | 0.802 |
| 52 | 3.316 | 8.854  | 0.992 |
| 53 | 3.347 | 3.572  | 0.843 |
| 54 | 3.357 | 2.143  | 0.676 |
| 55 | 3.396 | 3.732  | 0.878 |
| 56 | 3.4   | 8.564  | 0.975 |
| 57 | 3.41  | 11.784 | 0.998 |
| 58 | 3.422 | 3.122  | 0.862 |
| 59 | 3.454 | 8.554  | 0.988 |
| 60 | 3.476 | 9.859  | 0.995 |

|     |       |        |       |
|-----|-------|--------|-------|
| 61  | 3.477 | 11.027 | 0.997 |
| 62  | 3.484 | 10.575 | 0.992 |
| 63  | 3.486 | 2.226  | 0.666 |
| 64  | 3.497 | 3.235  | 0.83  |
| 65  | 3.514 | 3.992  | 0.857 |
| 66  | 3.531 | 5.036  | 0.862 |
| 67  | 3.54  | 6.099  | 0.882 |
| 68  | 3.558 | 5.91   | 0.869 |
| 69  | 3.584 | 4.397  | 0.816 |
| 70  | 3.589 | 4.083  | 0.846 |
| 71  | 3.603 | 9.156  | 0.997 |
| 72  | 3.611 | 3.235  | 0.656 |
| 73  | 3.619 | 10.636 | 0.979 |
| 74  | 3.648 | 3.559  | 0.661 |
| 75  | 3.655 | 8.873  | 0.969 |
| 76  | 3.662 | 9.654  | 0.986 |
| 77  | 3.662 | 4.873  | 0.929 |
| 78  | 3.668 | 8.58   | 0.973 |
| 79  | 3.675 | 4.211  | 0.769 |
| 80  | 3.684 | 13.133 | 0.996 |
| 81  | 3.695 | 3.202  | 0.912 |
| 82  | 3.714 | 4.408  | 0.982 |
| 83  | 3.729 | 8.711  | 0.921 |
| 84  | 3.744 | 9.003  | 0.858 |
| 85  | 3.748 | 5.83   | 0.737 |
| 86  | 3.756 | 12.262 | 0.999 |
| 87  | 3.768 | 6.849  | 0.923 |
| 88  | 3.775 | 5.75   | 0.937 |
| 89  | 3.793 | 9.26   | 0.991 |
| 90  | 3.795 | 6.609  | 0.905 |
| 91  | 3.795 | 5.267  | 0.895 |
| 92  | 3.799 | 9.525  | 0.969 |
| 93  | 3.813 | 6.562  | 0.872 |
| 94  | 3.82  | 11.491 | 0.998 |
| 95  | 3.821 | 7.717  | 0.942 |
| 96  | 3.832 | 7.35   | 0.941 |
| 97  | 3.839 | 12.751 | 0.998 |
| 98  | 3.854 | 7.191  | 0.868 |
| 99  | 3.861 | 9.399  | 0.972 |
| 100 | 3.866 | 5.017  | 0.798 |

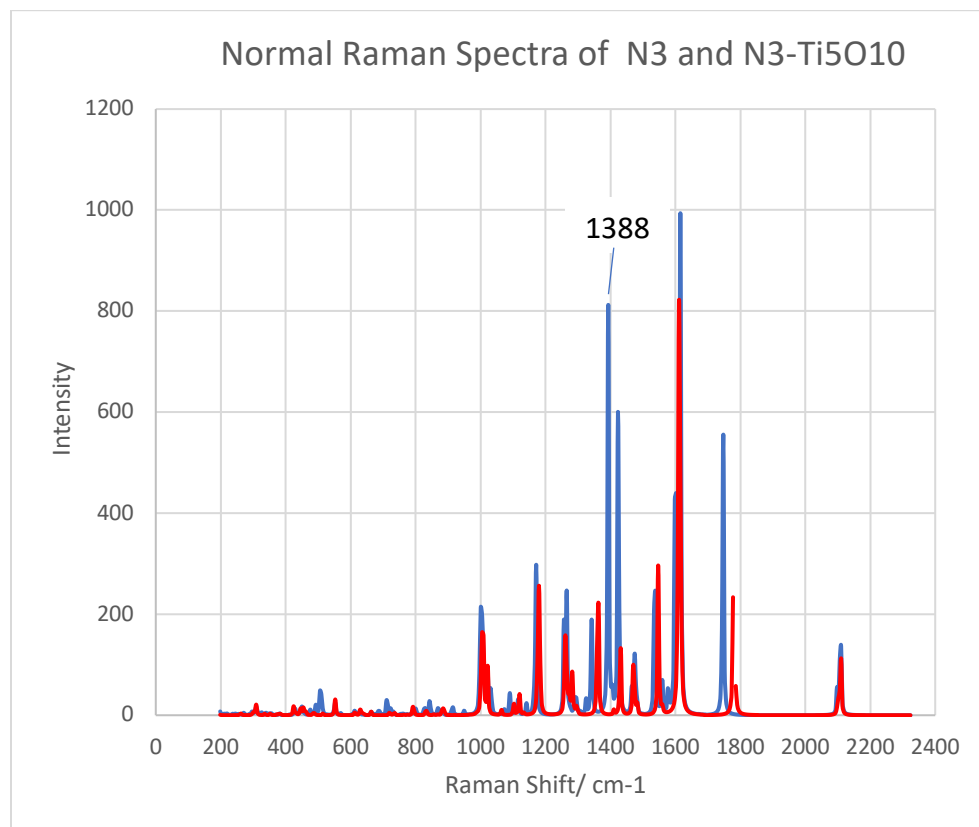

Figure S2. Raman Spectra of complex A (N3-(TiO<sub>2</sub>)<sub>5</sub>) ( blue) and isolated N3 dye (red). FWHM broadening 2 cm<sup>-1</sup>. A scaling factor 0.970 have been used for the Raman frequencies.

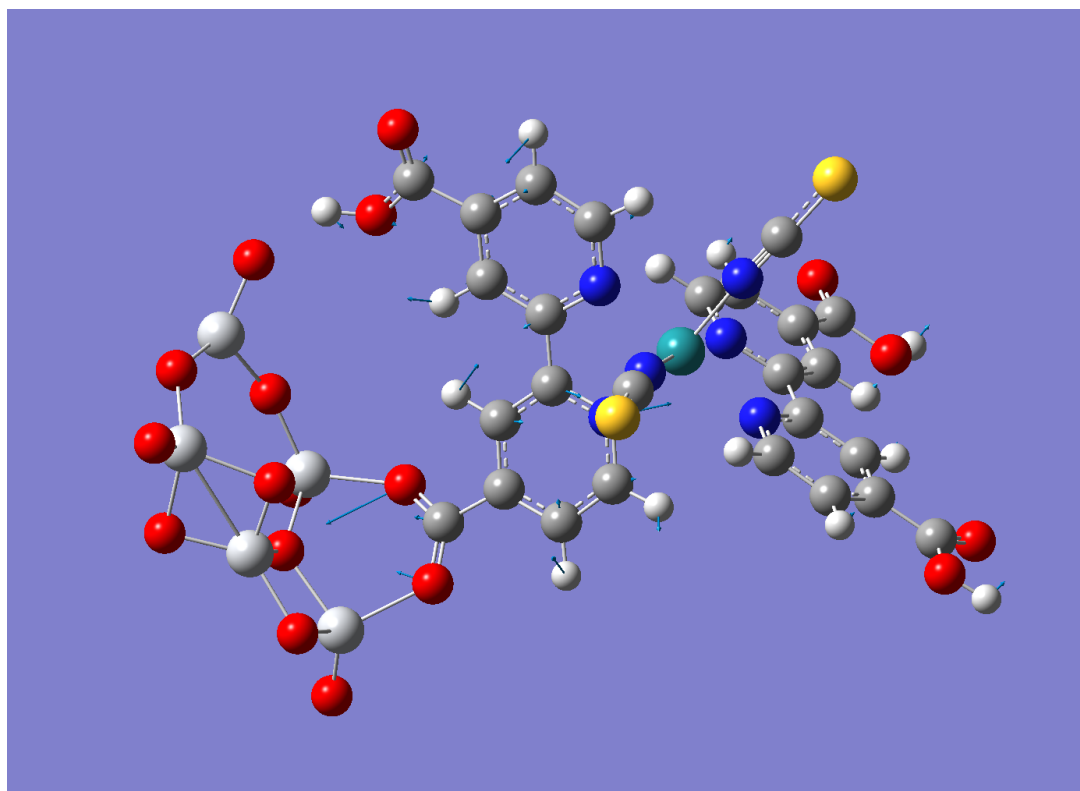

Figure S3. Vibration at scaled frequency  $500.3\text{ cm}^{-1}$  with displacement vectors involving anchoring -COO group.

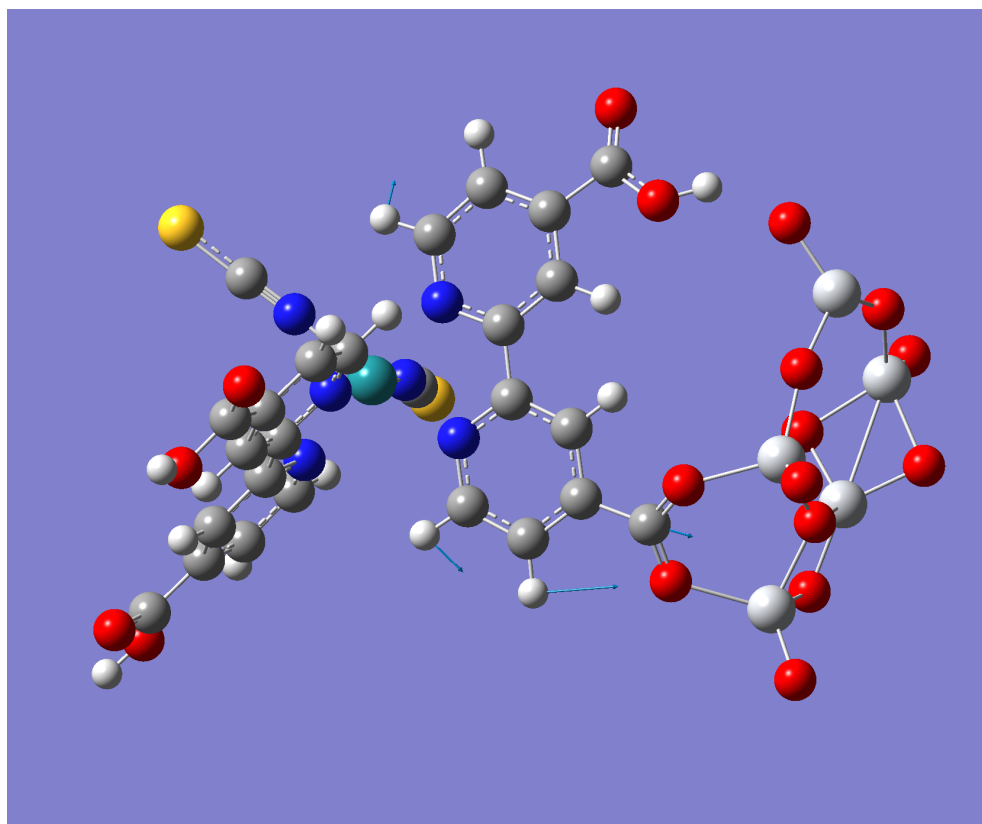

Figure S4. Vibration at scaled frequency  $1388.5\text{ cm}^{-1}$  with displacement vectors involving anchoring -COO group.



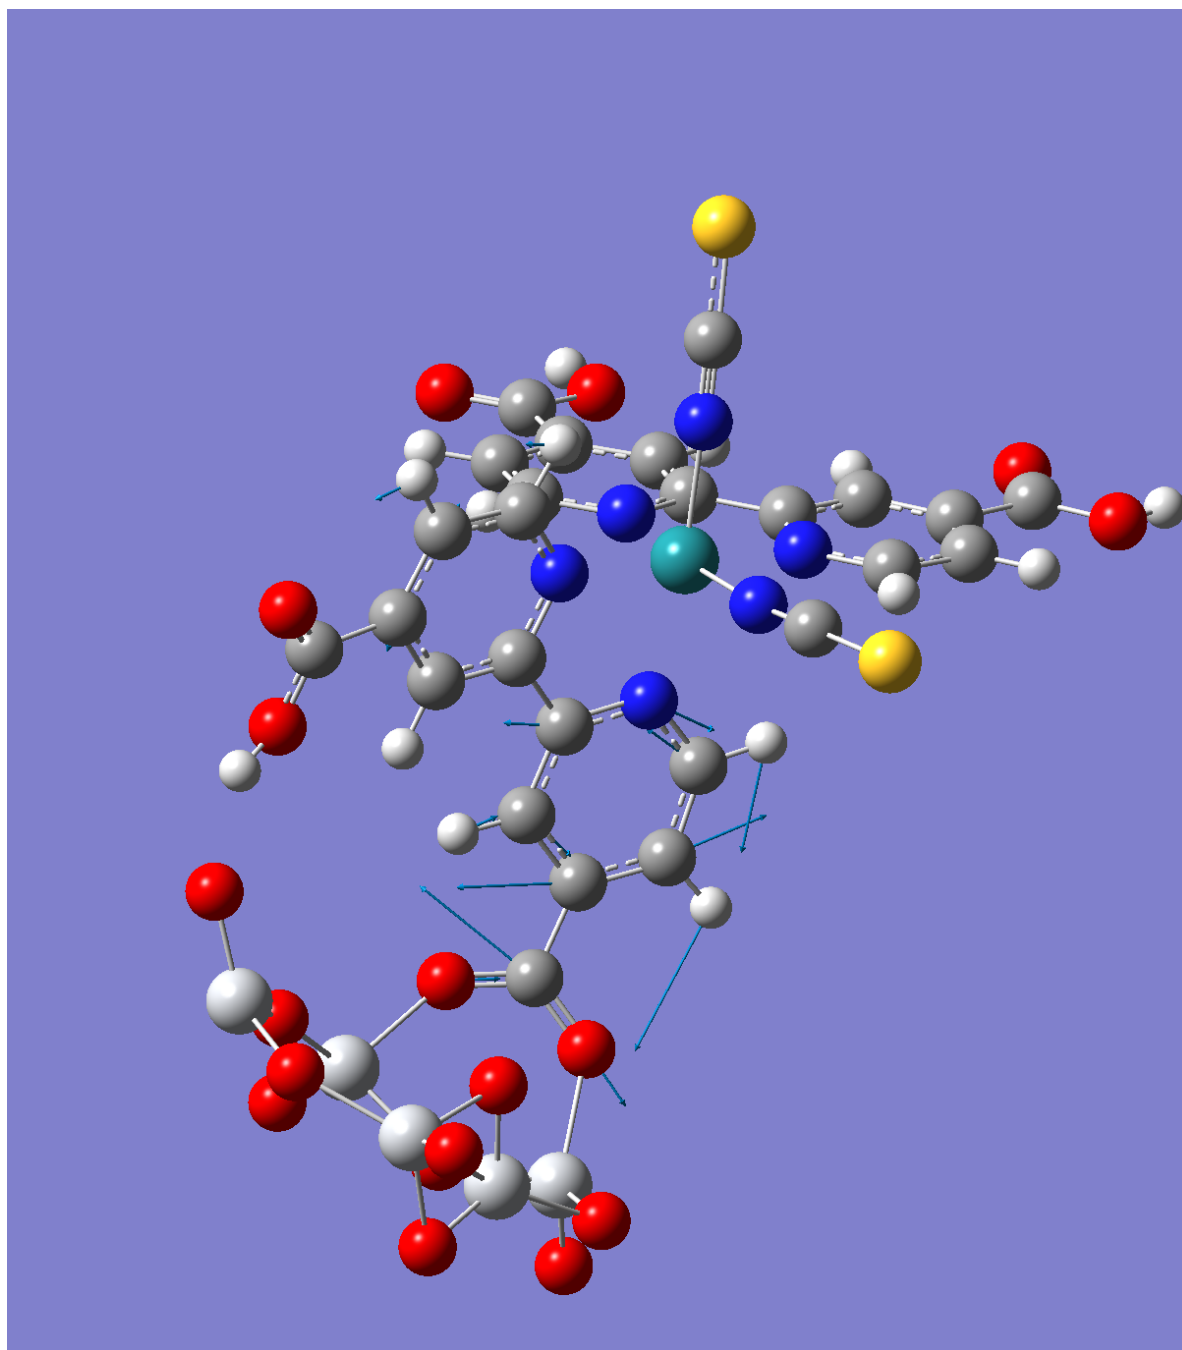

Figure S5. Vibration at scaled frequency  $1534.0\text{ cm}^{-1}$  with displacement vectors involving anchoring -COO group.

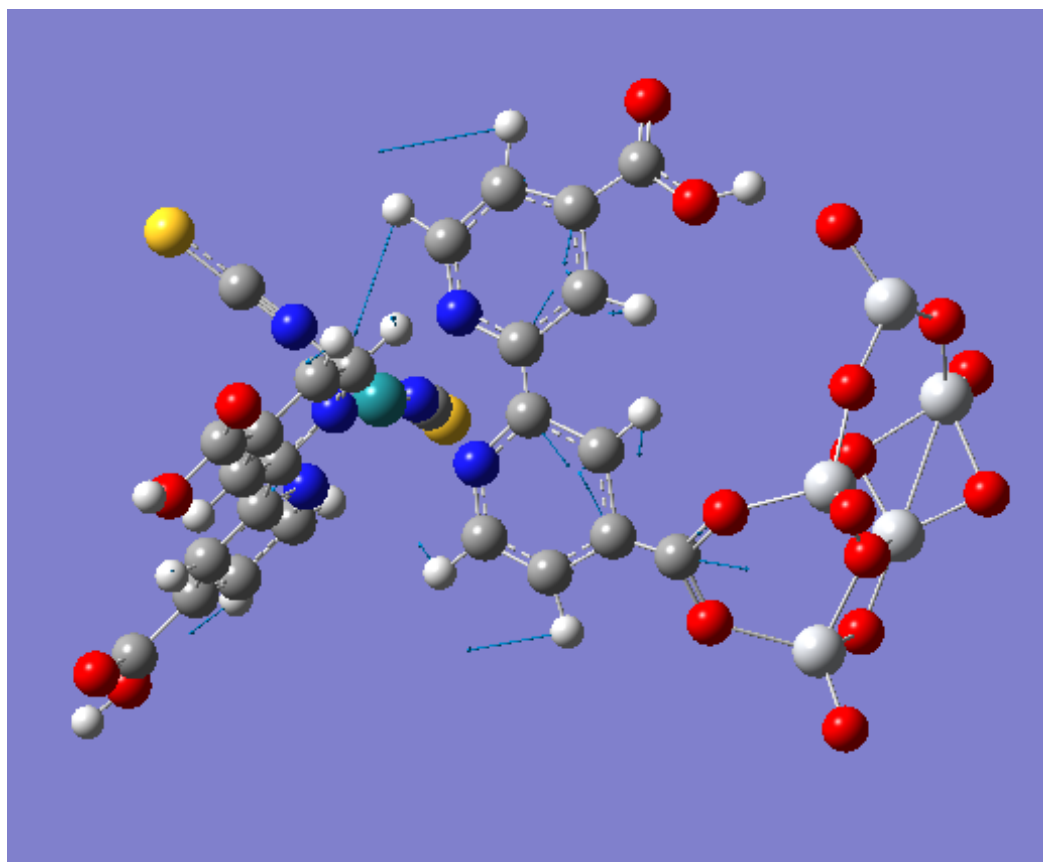

Figure S6. Vibration at scaled frequency  $1420.0\text{ cm}^{-1}$  with displacement vectors involving anchoring -COO group.
